# Supplementary material for: PACAP neuropeptide promotes Hepatocellular Protection via CREB-KLF4 dependent autophagy in mouse liver Ischemia Reperfusion Injury
Source: PubMed Central journal article supplement (PMC7150481; doi:10.7150/thno.42354), 2020-03-15
Supplement: thnov10p4453s1.pdf [file thnov10p4453s1.pdf]

Figure S1

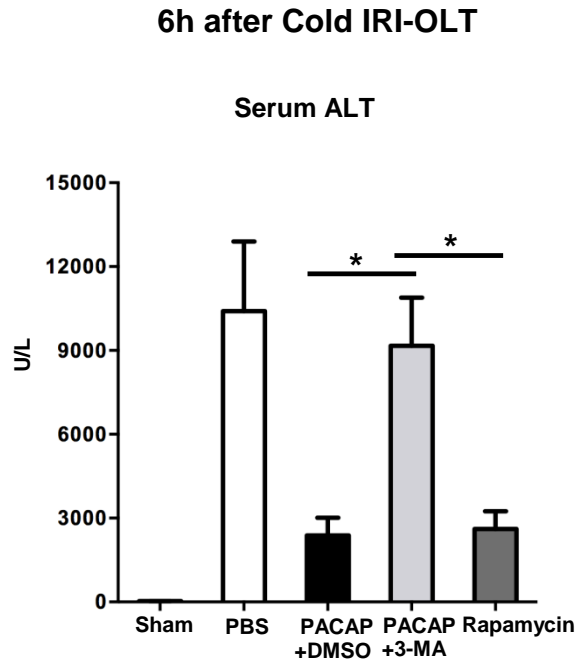

**Figure S1** In syngeneic orthotopic liver transplantation subjected to extended cold storage (in 4° C UW solution for 20h), there were four experimental groups of recipients treated with PBS, PACAP+DMSO PACAP+3-MA or Rapamycin at liver harvest and immediately prior to reperfusion through portal vein injection. Serum ALT levels were analyzed at 6h post-transplant (\*p<0.001, n=4-6/group).

Figure S2

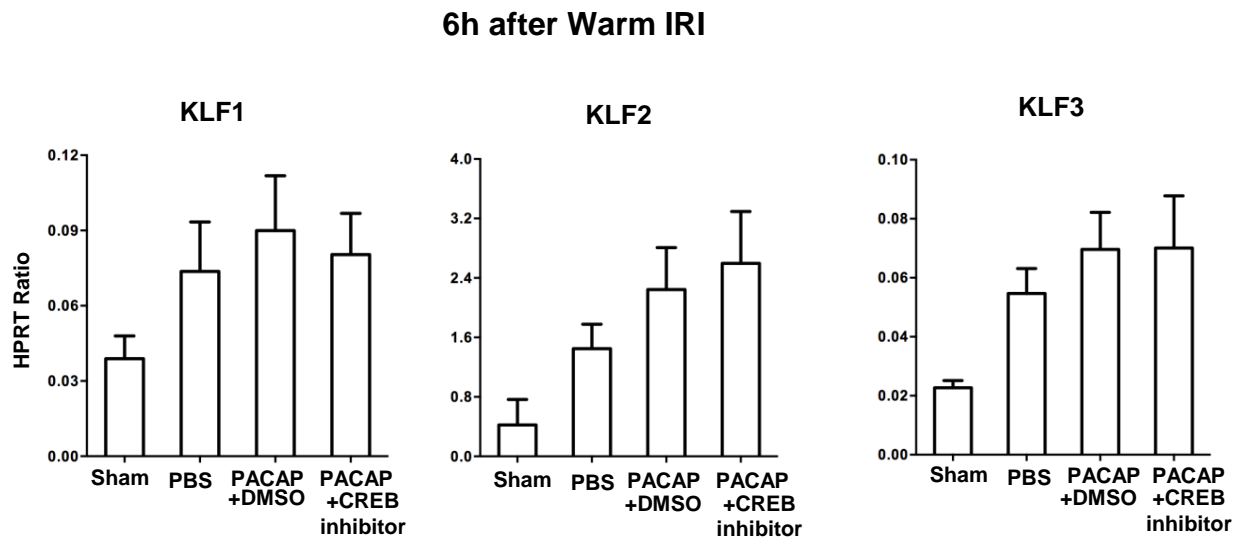

**Figure S2** qPCR of KLF1, KLF2 and KLF3 in liver IRI (n=4-6/group).

Figure S3

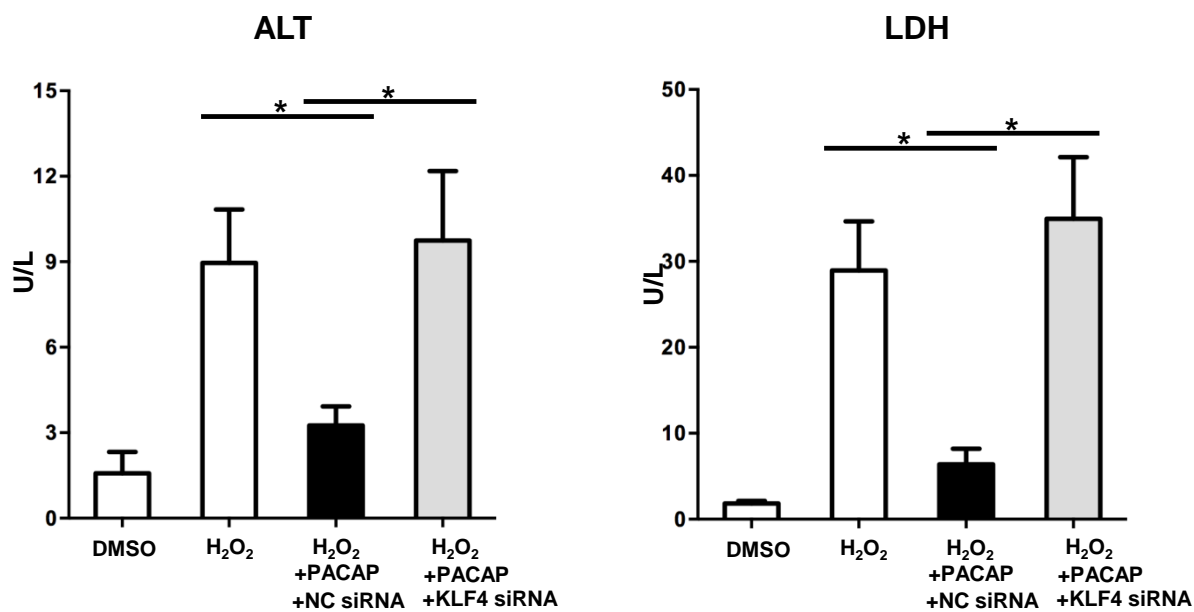

**Figure S3** siRNA-mediated KLF4 silencing in vitro. Primary hepatocytes were pre-treated with PACAP+NC siRNA, or PACAP+KLF4 siRNA 1h prior to H<sub>2</sub>O<sub>2</sub> stress. Supernatant ALT/LDH levels were assessed (\*p<0.001, n=6/group).

**Table S1**

**Primers used for qPCR**

| <b>Genes</b> | <b>sense</b>          | <b>antisense</b>          |
|--------------|-----------------------|---------------------------|
| LC3a         | catgagcggagttggtcaaga | ccatgctgtgctgggtga        |
| LC3b         | ctgaccacgtgaacatgagc  | acttcggagatgggagtg        |
| Beclin-1     | caggcgaaaccaggagag    | cgagtttcaataaatggctcct    |
| EGF          | catgccccacaggattg     | gggcaggaaacaagttcg        |
| HGF          | cacccttgggagattgtg    | gggacatcagtctcattcacag    |
| c-Met        | ctgctctggaggacaagacc  | gagttgatcacatgccaagc      |
| KLF1         | caagagctcgcacctcaag   | gagcgaacctccagtcaca       |
| KLF2         | ctaaaggcgcacatctgcgta | tagtggcgggtaagctcgt       |
| KLF3         | gtccagcccgttcctttat   | agggcttctcatatgattcaattac |
| KLF4         | cgggaaggaggagaagacact | gagttcctcacgccaacg        |
